# Supplementary material for: Erector spinae plane block versus paravertebral block on postoperative quality of recovery in obese patients undergoing laparoscopic sleeve gastrectomy: a randomized controlled trial
Source: PeerJ. 2024 May 28;12:e17431. doi: 10.7717/peerj.17431 (PMC11141559; doi:10.7717/peerj.17431)
Supplement: Supplemental Information 1 [file peerj-12-17431-s001.xlsx]

## Sheet: Sheet1
Group	Gender	Age	BMI	Duration of surgery	Time to first ambulation	Time to first anal exhaust	Complications of nerve blocks	Postoperative flurbiprofen consumption	Postoperative oxycodone consumption	PONV	Preoperative QoR15	24h QoR15 postoperatively	48h QoR15 postoperatively	0.5h resting NRS	0.5h coughing NRS	2h resting NRS	2h coughing NRS	6h resting NRS	6h coughing NRS	12h resting NRS	12h coughing NRS	24h resting NRS	24h coughing NRS	36h resting NRS	36h coughing NRS	48h resting NRS	48h coughing NRS
1	1	38	36.4	118	2	22	0	300	30	0	93	124	134	0	0	0	0	0	2	2	4	1	2	2	3	2	2
1	1	33	30.5	132	6	36	0	360	36	0	107	56	101	0	2	4	5	3	4	2	3	3	5	4	2	3	3
1	1	36	33.7	144	8	24	0	160	16	0	119	66	86	3	5	4	5	5	5	4	4	4	3	4	3	3	3
1	1	36	37.8	96	2	26	0	400	40	0	147	150	150	1	1	2	2	2	3	2	3	1	1	0	0	0	0
1	1	40	37.1	102	3	15	0	50	5	0	145	145	149	0	0	1	1	2	2	2	3	2	3	1	1	1	1
1	1	30	34.1	123	4	24	0	140	14	0	116	105	139	1	2	2	4	2	3	1	3	1	3	1	2	1	1
1	1	33	35.7	137	2	20	0	15	1	1	150	140	148	1	2	2	2	2	2	2	2	2	2	1	2	1	2
1	1	35	36.4	136	2	18	0	200	20	0	132	137	148	0	0	1	1	1	1	1	1	1	1	1	1	1	1
1	1	38	34.5	158	2	20	0	130	13	0	139	129	120	0	1	2	3	2	2	2	2	2	2	1	1	1	1
1	2	30	39.3	134	1	20	0	220	22	0	134	115	139	5	5	3	2	2	1	1	1	0	1	0	1	0	1
1	2	38	30.7	163	2	24	0	100	10	0	135	97	120	5	5	2	3	3	3	3	3	2	3	1	1	1	1
1	1	44	35.1	154	2	26	0	250	25	0	150	150	150	2	2	2	2	0	1	0	1	0	1	0	1	0	1
1	2	33	35.8	126	8	28	0	190	19	0	143	118	139	1	3	4	4	2	2	1	2	2	2	2	3	2	2
1	1	38	37.6	117	2	8	0	20	2	1	135	77	90	0	1	2	2	2	2	1	2	1	1	1	1	1	1
1	1	31	35.2	139	0.5	24	0	220	22	0	147	124	150	0	1	1	2	1	2	1	1	1	1	1	1	1	1
1	1	27	34.5	148	2	18	0	160	16	0	139	144	149	0	1	1	1	1	1	1	1	1	1	0	1	0	1
1	1	40	34.4	93	2	34	0	150	15	1	115	78	101	1	2	1	2	1	2	1	2	1	2	1	2	1	2
1	1	29	34.7	128	2	24	0	200	20	0	127	113	130	0	0	5	5	4	4	3	3	2	3	2	2	2	2
1	1	29	35.2	137	3	20	0	210	21	0	148	105	119	2	2	2	2	2	3	3	3	2	2	1	1	1	1
1	2	26	37.8	153	2	36	0	160	16	1	131	105	126	0	0	2	3	3	3	3	3	1	1	1	1	0	1
1	2	22	39.8	129	6	22	0	180	18	0	132	138	144	0	0	2	3	3	3	2	2	1	1	1	1	0	1
1	1	38	35.7	99	2	30	0	110	11	1	144	150	150	0	1	1	1	0	0	0	0	0	0	0	0	0	0
1	2	30	36.7	133	2	23	0	340	34	0	113	146	149	1	2	2	2	2	2	1	1	1	1	1	1	0	1
1	1	27	38.7	138	2	20	0	30	3	0	135	136	144	0	2	0	2	0	1	0	1	0	1	0	1	0	1
1	1	32	30.9	178	2	24	0	240	24	0	148	143	147	2	3	1	2	1	2	1	2	1	1	1	1	1	1
1	1	34	32.5	118	2	18	0	360	36	0	140	114	123	6	7	4	5	3	3	2	2	2	2	1	2	1	1
1	1	39	34.9	111	2	3	0	30	3	0	140	124	145	1	1	1	2	1	2	1	1	1	1	1	1	1	1
1	1	21	38.7	134	2	14	0	120	12	0	136	134	148	0	0	3	3	3	3	2	2	2	2	2	2	1	2
1	1	23	39.2	158	2	28	0	150	15	0	136	134	134	3	4	2	2	2	2	1	2	1	1	1	1	1	1
1	1	31	34.9	98	4	24	0	210	21	0	107	119	109	0	0	2	3	2	3	2	2	2	2	1	1	1	2
1	1	32	35.9	137	2	36	0	220	22	0	144	110	127	0	1	1	2	1	1	1	1	2	3	1	2	1	1
1	1	31	36.1	133	2	22	0	240	24	0	136	104	134	1	2	2	2	2	2	1	1	1	1	1	1	0	1
1	1	27	38.7	164	2	26	0	20	2	1	130	129	140	0	1	2	3	2	3	2	2	1	2	1	2	1	1
1	1	33	31.8	123	2	28	0	290	29	0	150	149	150	1	2	2	2	1	1	1	2	1	2	1	1	1	1
1	1	20	35.9	103	2	16	0	60	6	0	143	145	148	12	1	1	1	1	1	1	1	1	1	0	1	0	1
1	2	23	37.6	96	2	25	0	390	39	1	140	107	125	0	0	1	1	1	2	1	1	1	1	0	1	0	1
1	1	31	34.5	131	2	24	0	230	23	0	133	138	148	0	0	1	2	2	2	2	2	1	2	1	1	1	1
1	1	37	36.7	117	2	22	0	240	24	1	128	132	138	0	0	1	2	2	3	2	3	1	2	2	2	1	1
1	2	24	39.9	136	2	26	0	310	31	0	145	138	145	0	0	3	3	2	3	2	2	1	1	1	1	1	1
1	1	19	36.9	144	2	23	0	350	35	1	140	120	108	0	0	1	2	2	3	3	5	3	4	3	3	2	3
1	2	32	35.6	129	2	20	0	220	22	0	150	147	145	0	0	2	2	2	3	2	2	1	2	1	1	1	1
1	2	36	35.2	133	2	26	0	170	17	1	110	97	95	3	5	3	4	3	4	3	3	4	4	4	4	2	3
1	2	43	38.5	153	2	10	0	80	8	0	150	137	143	2	2	2	3	2	3	4	4	1	2	1	1	0	1
1	2	45	36.1	103	9	18	0	350	35	0	131	139	139	0	0	2	2	2	3	1	2	3	4	3	3	2	2
1	1	32	35.4	105	2	16	0	260	26	1	138	125	135	1	3	1	2	1	3	1	3	1	2	1	1	0	1
1	1	20	38.7	155	2	18	0	280	28	0	139	130	147	0	0	1	2	1	2	1	2	2	3	1	2	1	1
1	1	42	35.6	136	2	48	0	300	30	0	145	150	137	1	1	2	3	2	2	2	2	1	2	2	2	2	2
1	2	21	35.5	117	2	26	0	390	39	0	134	136	144	2	4	2	3	2	3	2	2	1	2	1	2	2	2
1	1	29	30.5	98	2	20	0	350	35	1	133	135	144	2	2	1	2	2	2	1	2	2	2	1	2	1	1
1	1	32	39.2	142	2	13	0	20	2	1	139	80	137	0	1	1	1	1	2	2	2	2	2	1	2	1	1
1	1	27	33.7	99	2	29	0	310	31	0	150	141	150	0	0	1	1	1	1	1	1	2	2	1	2	1	1
1	1	32	37.1	134	2	20	0	100	10	0	139	128	136	0	0	1	2	2	3	2	2	2	3	1	1	1	1
1	1	32	37.5	156	2	18	0	30	3	0	129	141	147	1	2	2	2	2	2	2	3	2	2	0	0	0	0
1	2	27	39.4	133	2	22	0	70	7	1	142	133	140	2	2	2	3	2	3	3	3	3	4	4	4	1	1
2	1	28	36.1	131	1	10	0	180	18	0	141	127	144	3	4	2	3	2	3	3	3	1	2	1	1	1	1
2	2	37	35.5	144	2	20	0	80	8	0	135	142	150	2	4	2	3	2	2	1	2	1	1	0	0	0	0
2	1	31	38.9	122	2	20	0	90	9	0	138	148	150	3	3	1	2	1	2	1	1	1	1	0	1	0	1
2	1	31	30.8	138	2.5	32	0	30	3	1	142	107	145	0	0	3	3	3	3	2	2	2	3	1	1	1	1
2	2	33	36.6	106	0.5	25	0	400	40	0	135	116	116	1	1	1	1	1	1	4	4	2	3	0	0	0	0
2	1	45	36.8	157	2	19	0	320	32	0	142	150	146	3	4	2	2	2	2	1	2	1	1	1	1	0	1
2	2	33	35.2	166	2	36	0	30	3	1	150	124	150	0	0	2	2	3	3	3	3	2	2	1	1	0	1
2	1	30	35.3	156	2	21	0	40	4	0	135	149	150	0	1	1	2	1	1	0	1	0	1	0	1	0	0
2	2	45	36.7	142	2	22	0	20	2	0	114	98	96	0	0	1	1	1	2	1	1	1	1	0	1	0	1
2	1	38	38.1	133	2	36	0	320	32	0	139	120	128	0	1	0	1	0	1	2	1	3	1	2	2	2	2
2	1	29	35.5	127	2	24	0	400	40	0	144	85	131	4	5	3	3	2	2	2	2	2	2	1	1	1	1
2	1	41	38.3	141	2	24	0	270	27	0	128	143	101	3	3	1	2	1	2	1	1	1	1	3	2	3	2
2	1	32	32.8	113	2	22	0	150	15	0	146	143	145	5	5	3	3	2	2	2	2	1	2	0	1	0	1
2	1	31	37.8	148	2	20	0	220	22	0	149	88	122	2	2	2	2	2	3	3	3	4	4	3	2	2	2
2	1	27	34.6	95	2	24	0	100	10	1	105	109	110	1	2	2	2	2	2	1	2	2	3	1	1	0	1
2	1	27	36.7	99	2	24	0	140	14	0	125	132	135	0	1	1	3	2	3	2	3	1	2	1	1	1	1
2	1	33	37.6	128	2	13	0	130	13	1	149	116	146	2	3	2	3	2	2	1	2	1	1	1	1	1	1
2	2	25	36.4	138	6	24	0	120	12	1	137	110	124	0	0	2	3	2	2	2	2	1	2	1	1	1	1
2	1	36	36.9	137	6	18	0	70	7	0	133	92	141	0	0	1	2	1	2	2	2	1	1	1	1	1	1
2	1	27	39.4	129	2	18	0	240	24	0	148	150	150	2	3	2	2	2	2	1	2	1	1	1	1	1	1
2	2	32	39.9	113	2	18	0	200	20	1	125	136	121	2	2	2	2	2	3	2	2	1	1	1	1	0	0
2	1	37	30.3	149	2	28	0	190	19	1	138	115	133	0	0	3	3	2	2	2	2	1	1	1	1	2	2
2	1	38	34.5	147	2	28	0	140	14	0	145	145	148	0	0	1	1	1	1	1	1	1	2	0	1	0	1
2	1	39	39.2	116	2	26	0	80	8	0	142	145	148	0	0	1	1	1	1	1	1	1	1	0	1	0	0
2	1	40	37.7	128	2	20	0	340	34	1	148	119	145	0	0	2	3	2	3	3	3	3	3	1	2	0	1
2	1	29	35.5	107	2	16	0	140	14	1	145	96	143	0	0	2	3	2	3	3	4	3	3	2	2	2	2
2	1	36	38.5	118	2	10	0	80	8	1	137	139	145	0	0	2	2	1	2	1	2	1	1	0	1	0	1
2	1	27	33.1	144	2	8	0	100	10	1	148	116	121	0	1	1	1	1	1	0	1	1	1	0	1	0	0
2	1	31	38.1	156	2	25	0	280	28	0	142	70	113	1	1	2	2	2	2	2	2	2	2	1	2	1	1
2	2	19	36.3	133	2	20	0	270	27	0	147	150	150	3	4	3	3	2	3	2	3	2	2	1	2	0	0
2	1	26	34.8	97	2	2	0	70	7	0	119	109	119	0	3	1	3	1	2	1	2	1	2	1	1	0	1
2	1	35	32.5	157	2	16	0	270	27	0	140	145	142	1	3	1	1	1	1	1	1	0	0	0	0	0	0
2	1	34	30.8	148	2	23	0	160	16	0	113	112	133	3	4	3	3	2	2	2	2	2	2	1	2	1	1
2	1	29	39.4	137	2	20	0	120	12	0	120	108	120	1	1	1	1	2	3	4	4	2	2	2	2	1	1
2	1	34	35.6	146	2	26	0	130	13	0	145	144	150	1	1	1	2	1	2	1	1	1	1	1	1	1	1
2	1	35	32.2	125	2	26	0	170	17	1	148	105	129	1	1	1	1	1	1	1	2	1	2	1	1	1	1
2	1	41	34.1	118	2	18	0	150	15	0	112	120	102	0	0	0	0	2	3	4	4	3	3	1	2	1	2
2	1	30	38.4	110	2	20	0	200	20	0	132	134	150	1	2	2	3	2	3	2	2	1	2	1	2	1	1
2	1	33	35.7	108	2	18	0	200	20	0	142	122	150	0	1	1	2	1	1	1	1	1	1	1	1	1	1
2	1	44	31.7	97	2	24	0	180	18	0	131	117	119	0	1	2	3	2	2	1	1	1	1	0	1	0	1
2	2	22	34.4	122	2	25	0	300	30	0	128	116	130	2	4	2	2	2	2	3	2	3	3	1	2	1	2
2	1	32	35.6	118	2	20	0	160	16	0	150	129	150	3	4	2	3	2	2	2	2	1	2	0	1	0	1
2	2	34	39.8	137	2	19	0	60	6	0	127	124	132	0	0	1	1	2	2	1	2	1	1	1	1	1	1
2	1	21	37.8	139	2	28	0	190	19	0	144	133	144	2	3	1	2	1	2	1	1	1	1	2	1	2	2
2	1	31	32.6	109	2	36	0	90	9	1	143	120	140	0	1	1	2	1	2	1	2	1	1	1	2	1	1
2	1	30	31.9	124	2	17	0	310	31	0	150	125	144	2	3	1	2	2	2	2	2	2	3	1	2	1	2
2	1	25	36.8	117	2	20	0	250	25	0	136	133	121	0	1	1	1	2	2	1	1	1	2	1	1	1	1
2	2	40	36.8	98	2	23	0	20	2	0	148	143	136	0	0	1	1	2	2	2	2	0	1	0	1	0	1
2	1	38	31.8	136	2	24	0	140	14	0	130	86	103	2	3	2	3	3	3	2	2	2	2	1	2	1	1
2	2	24	36.8	122	2	26	0	150	15	0	150	148	148	0	1	1	1	1	1	1	1	2	2	1	2	1	1
2	1	31	37.7	128	2	24	0	120	12	0	141	124	138	0	0	1	2	1	2	1	2	2	2	1	1	0	1
2	1	33	33.8	98	2	6	0	240	24	0	141	127	142	0	1	1	2	2	3	4	4	1	1	1	1	0	0
2	1	35	37.2	145	2	18	0	150	15	0	146	128	148	2	3	2	3	3	4	4	5	2	2	2	2	1	1
